# Supplementary material
Source: Springer Nature journal article supplement (https://www.springermedizin.de/resource/supplementary/12891_2013_1842_MOESM1_ESM.pdf/9508574)
Supplement: MOESM1 [file 9508574]

Additional File 1: Questions on the self-screening questionnaire.

|                                                                                                                                    |                              |                             |
|------------------------------------------------------------------------------------------------------------------------------------|------------------------------|-----------------------------|
| 1. Have you been referred to physiotherapy for a problem with your shoulder?                                                       | Yes <input type="checkbox"/> | No <input type="checkbox"/> |
| 2. Do your shoulder symptoms get worse, even for just a moment or two, when you move or place your arm in a particular position?   | Yes <input type="checkbox"/> | No <input type="checkbox"/> |
| 3. Have you had an operation on your shoulder in the last five years?                                                              | Yes <input type="checkbox"/> | No <input type="checkbox"/> |
| 4. Have you broken or fractured one of the bones in your shoulder in the last five years?                                          | Yes <input type="checkbox"/> | No <input type="checkbox"/> |
| 5. Has your shoulder “popped out of joint” or dislocated in the last five years?                                                   | Yes <input type="checkbox"/> | No <input type="checkbox"/> |
| 6. Do your shoulder symptoms get worse when you move or place <i>your neck</i> rather than your shoulder in a particular position? | Yes <input type="checkbox"/> | No <input type="checkbox"/> |
| If all your answers fall in the grey shaded boxes, you have the type of shoulder symptoms we are investigating in our study.       |                              |                             |
